1 **Bacterial Infection of the Placenta Induces Sex-Specific Responses in the Fetal Brain**

2 Kun Ho Lee<sup>1,2</sup>, Matti Kiupel<sup>3</sup>, Thomas Woods<sup>3</sup>, Prachee Pingle<sup>2</sup> and Jonathan Hardy<sup>1,2\*</sup>

3 <sup>1</sup>Department of Microbiology and Molecular Genetics, Michigan State University, East Lansing,  
4 MI, United States.

5 <sup>2</sup>Institute for Quantitative Health and Science Engineering, Michigan State University, East  
6 Lansing, MI, United States.

7 <sup>3</sup>Department of Pathology and Diagnostic Investigation, Michigan State University, East Lansing,  
8 MI, United States.

9 \*Corresponding author:

10 Address: Room 3313

11 775 Woodlot Dr.

12 East Lansing, MI 48824

13 Phone: (517) 884-6971

14 E-mail: [hardyjon@msu.edu](mailto:hardyjon@msu.edu)

15 **Category of study:** Basic Science

16 **Impact:**

- 17 • Placental infection with *Listeria monocytogenes* induces sexually dichotomous gene  
18 expression patterns in the fetal brain.
- 19 • Abnormal cortical lamination is correlated with placental infection levels.
- 20 • Placental infection results in autism related behavior in male offspring and heightened  
21 anxiety level in female offspring.

22

23 **BACKGROUND:** Epidemiological data indicate that prenatal infection is associated with an  
24 increased risk of several neurodevelopmental disorders in the progeny. These disorders display  
25 sex differences in presentation. The role of the placenta, which is a target of prenatal infection, in  
26 the sex-specificity of neurodevelopmental abnormalities is unknown. We used an imaging-based  
27 animal model of the bacterial pathogen *Listeria monocytogenes* to identify sex-specific effects of  
28 placental infection on neurodevelopment of the fetus.

29 **METHODS:** Pregnant CD1 mice were infected with a bioluminescent strain of *Listeria* on  
30 embryonic day 14.5 (E14.5). Excised fetuses were imaged on E18.5 to identify the infected  
31 placentas. The associated fetal brains were analyzed for gene expression and altered brain structure  
32 due to infection. The behavior of adult offspring affected by prenatal *Listeria* infection was  
33 analyzed.

34 **RESULTS:** Placental infection induced sex-specific alteration of gene expression patterns in the  
35 fetal brain and resulted in abnormal cortical development correlated with placental infection levels.  
36 Furthermore, male offspring exhibited abnormal social interaction, whereas females exhibited  
37 elevated anxiety.

38 **CONCLUSION:** Placental infection by *Listeria* induced sex-specific abnormalities in  
39 neurodevelopment of the fetus. Prenatal infection also affected the behavior of the offspring in a  
40 sex-specific manner.

41

42

43

## 44 INTRODUCTION

45           The molecular and cellular mechanisms leading to most neuropsychiatric disorders, such  
46 as autism spectrum disorder (ASD), remain unclear due to their complex polygenic etiology.  
47 Epidemiological data indicate that prenatal infection with bacterial, viral, or parasitic pathogens  
48 during pregnancy is associated with an increased risk of neuropsychiatric disorders in the progeny,  
49 including ASD<sup>1</sup> and schizophrenia<sup>2,3</sup>. Injection of bacterial endotoxin lipopolysaccharide (LPS) or  
50 polyinosinic-polycytidylic acid [poly(I:C)], which mimics viral infections, activates the immune  
51 system of pregnant rodents and results in altered brain gene expression<sup>4</sup> and atypical behavior in  
52 offspring<sup>5</sup>. These behavioral abnormalities are notably relevant to ASD core symptoms, such as  
53 repetitive behaviors and deficit in social interaction. Furthermore, animal studies show sex biased  
54 behaviors and responses in offspring after exposing to LPS and poly(I:C) during pregnancy, which  
55 resembles sex differences in neuropsychiatric disorders, including ASD<sup>6,7</sup>. Maternal immune  
56 activation (MIA) induced by LPS or poly(I:C) causes the changes in fetal brain development.  
57 Although injection of immunogens in pregnant animals results in consistent altered behavior and  
58 brain abnormalities in the progeny, they do not elicit the complex immune responses induced by  
59 actual infection. Prenatal pathogens exhibit tissue and cell-specificity as well as directed immune  
60 modulation, such that the different pathogens may regulate MIA differently. For example,  
61 infection of rats with Group B *Streptococcus* elicits distinct MIA patterns including neutrophil  
62 infiltrates that differ from immune stimulants such as LPS and poly(I:C)<sup>8</sup>. In addition, prenatal  
63 influenza is a risk factor for schizophrenia<sup>2</sup>, whereas no such association was found with prenatal  
64 infection with either maternal type 1 herpes simplex virus<sup>9,10</sup> or cytomegalovirus<sup>11</sup>. Thus, the  
65 induction of MIA is complex and cannot be completely replicated by any single approach. It is

66 therefore critically important to examine different prenatal infection models and their specific  
67 effects on fetal brain development and behavior.

68 *Listeria monocytogenes* (*Lm*) provides an excellent animal model for prenatal infection<sup>12,13</sup>.  
69 This Gram-positive bacterium is a foodborne pathogen and is a significant health concern during  
70 pregnancy because pregnant women are up to 10 times more likely to be infected with *Lm*<sup>14</sup>. An  
71 important hallmark of prenatal listeriosis is the infection of the placenta<sup>15-17</sup>. Placental infection by  
72 *Lm* can lead to many overt fetal and newborn pathologies, including spontaneous abortions,  
73 stillbirth, and other neonatal illnesses, even while pregnant mothers can be largely  
74 asymptomatic<sup>12,18-20</sup>. Previously, we reported that bradycardia was only observed in fetuses with  
75 infected placentas within the same infected pregnant mouse as those with normal heart rates<sup>21</sup>.  
76 These studies demonstrated that bradycardia induced by placental infection was not systemic but  
77 localized.

78 Infection with the appropriate dose of intravenous *Lm* on embryonic day 14.5 results in  
79 abortion, stillbirth, and fetal bradycardia in the absence of overt maternal disease symptoms.  
80 Although placental infection by *Lm* causes adverse outcomes in newborns, neurodevelopmental  
81 consequences of this infection have not been characterized. In addition, sex-specific consequences  
82 of placental infection have not been defined for any living pathogen. The aims of this study were  
83 to understand how bacterial infection of the placenta affects fetal neurodevelopment, to determine  
84 if sex-specific responses occur, and to assess effects on the behavior of the offspring.

85

86



## 87 **METHODS**

### 88 **Animal care and use**

89 All animal procedures were approved by the Institutional Animal Care and Use Committee  
90 and the Biosafety of Michigan State University under protocol number 201800030. Michigan State  
91 University (MSU) has approved Animal Welfare Assurance (A3955-01) from the NIH Office of  
92 Laboratory Animal Welfare (OLAW). In addition, all components of the University are accredited  
93 by the Association for Assessment and Accreditation of Laboratory Animal Care, International  
94 (AAALAC Unit #1047). Standard BSL-2 containment and handling procedures were used for all  
95 animals including the offspring. These procedures were also approved according to the specific  
96 MSU Biosafety Protocol 0000058, and all laboratories, procedure rooms and facilities are  
97 inspected by MSU Environmental Health and Safety. Timed CD1 pregnant mice purchased from  
98 Charles River Laboratories were used for all studies and housed in temperature controlled, 12:12  
99 hour light and dark cycle rooms. Euthanasia was performed by cervical dislocation under  
100 isoflurane anesthesia by trained personnel according to NIH and MSU approved protocols.

### 101 ***In vivo* bioluminescence imaging (BLI) and tissue processing**

102 The bioluminescent strain of *L. monocytogenes* used in this study (Perkin Elmer Xen32)  
103 was generated in a 10403S strain background<sup>22</sup>. Cultures were incubated overnight at 37°C in brain  
104 heart infusion (BHI) broth. The overnight culture was sub-cultured in fresh BHI broth to an optical  
105 density (OD<sub>600</sub>) of 0.5. Timed embryonic day 11 (E11) pregnant CD1 mice were housed at the  
106 Michigan State University Clinical Center animal facility under BSL-2 containment. Pregnant  
107 mice were administered a tail vein injection of  $2 \times 10^5$  colony-forming units (CFU) of Xen32,  
108 diluted in 200  $\mu$ L phosphate-buffered saline (PBS), or an equivalent volume of PBS vehicle on  
109 E14.5. On E18.5, pregnant mice were anesthetized using isoflurane and imaged using the *In vivo*

110 bioluminescence imaging system (IVIS; Perkin Elmer Inc.), and then humanely scarified by  
111 cervical dislocation while under isoflurane anesthesia according to the approved animal protocol.  
112 Uterine horns were excised immediately and imaged again using the IVIS. Individual fetuses could  
113 be imaged separately for high-resolution BLI. Signal levels from the placenta at this dose and  
114 timing vary over orders of magnitude within one pregnant mouse, permitting the analysis of  
115 systemic versus localized effects and allowing for comparisons of fetal brains with and without  
116 high placental BLI signal from the same pregnant animal. Fetal brains were collected and  
117 transferred into sterile Eppendorf tubes, flash-frozen, and stored at -80°C until analyzed.

### 118 **Histology**

119 For histology of the fetal brain, excised fetuses and placentas were imaged with ex vivo  
120 BLI to determine signal levels of the associated placentas. The heads were removed and fixed  
121 overnight in 4% paraformaldehyde for sectioning. Following sectioning, the brains were routinely  
122 processed and embedded in paraffin and matched coronal sections were stained with hematoxylin  
123 and eosin (H&E). Matched coronal sections were also obtained from PBS-injected pregnant mice  
124 and from fetuses with and without detectable BLI signals from the placenta from infected pregnant  
125 mice. BLI signals from the placenta were measured with identical regions of interest (ROIs). For  
126 immunohistochemistry of brains of the adult offspring, the animals were euthanized with CO<sub>2</sub>  
127 according to the approved animal protocol. The brains were removed, fixed in 4%  
128 paraformaldehyde and matched coronal sections were obtained as described above. Several  
129 sections from each brain were stained with H&E following the same routine methods or  
130 immunohistochemically labeled with a rabbit monoclonal anti-c-Fos antibody (dilution 1:1,000,  
131 EPR21930-238, Abcam, Boston, MA). Immunohistochemistry was performed on the Dako link  
132 48 Automated Staining System (Agilent Technologies, Santa Clara, CA) using a high pH antigen

133 retrieval and peroxidase-conjugated EnVision Polymer Detection System (Aligent Technologies)  
134 with 3,3'-diaminobenzidine (DAB) as the chromogen and hematoxylin counterstaining.

### 135 **RNA-seq**

136 Total RNA was isolated using the phenol/guanidine based QIAzol lysis reagent (Qiagen,  
137 Valencia, CA), according to the manufacturer's recommendations. The concentration and quality  
138 of RNA samples were measured using Qubit (ThermoFisher) and BioAnalyzer (Agilent),  
139 respectively. Samples with RNA integrity number values of 9 or above were selected for  
140 sequencing. Fetal brains (positive BLI signal n = 19; control n =6) were collected and total RNA  
141 was submitted for next generation sequencing (NGS) library preparation and sequencing to  
142 Research Technology Support Facility at Michigan State University. Libraries were prepared using  
143 the Illumina TruSeq Standard mRNA Library Preparation Kit with IDT for Illumina Unique Dual  
144 Index adapters following manufacturer's recommendations. Completed libraries were quality  
145 checked and quantified using a combination of Qubit dsDNA High Sensitivity and Agilent 420  
146 TapeStation HS DNA1000 assays. Libraries were pooled in equimolar proportions for multiplexed  
147 sequencing. The pool was quantified using the Kapa Biosystems Illumina Library Quantification  
148 qPCR kit. This pool was loaded onto two lanes of an Illumina HiSeq 4000 flow cell (two technical  
149 replicates) and sequencing was performed in a 1 x 50 single read format using HiSeq 4000 SBS  
150 reagents. Base calling was done by Illumina Real Time Analysis v2.7.7 and output of RTA was  
151 demultiplexed and converted to FastQ format with Illumina Bcl2fastq v2.19.1. The raw single-end  
152 (SE) reads were processed to trim sequencing adapter and low-quality bases. The clean SE RNA-  
153 seq reads were mapped to the mouse reference genome (GCRm38.p6/mm10) using STAR (Spliced  
154 Transcriptions Alignment to a Reference) v2.3.2<sup>23</sup>. Mapped reads were assigned to genes with  
155 FeatureCounts in the subread package<sup>24</sup>.

## 156 **Differential gene expression analysis and functional enrichment analysis**

157 Differential gene expression analysis was performed using DESeq2 v1.32.0<sup>25</sup> in R v4.1.1.  
158 Genes with minimum 5 raw reads in at least 20 samples were filtered out, resulting a total of 19,180  
159 of genes. Differentially expressed genes with  $p\text{-adj} < 0.05$  were used to perform functional  
160 enrichment analysis using the g:Profiler system (<https://biit.cs.ut.ee/gprofiler/gost>)<sup>26</sup>. Biological  
161 pathways with  $p\text{-adj} < 0.05$  were considered significant. To examine the sex dependent effects of  
162 placental infection, a female specific gene, *Xist*, was used to identify the sex of fetal brains from  
163 RNA-seq samples. Differential gene expression and functional enrichment analyses were  
164 performed using the same parameters as placental infection. Volcano plots were generated using  
165 EnhancedVolcano package in R<sup>27</sup>.

## 166 **Social interactions and repetitive behaviors**

167 The three-chamber social approach assay has been widely used to test for assaying  
168 sociability in mice<sup>28</sup>. This assay measures interaction between animals that are provided choices  
169 between unfamiliar animals and inanimate objects (social interaction). We used a custom three-  
170 chamber apparatus (63 cm x 30 cm x 31 cm) with an empty middle chamber and accessible side  
171 chambers on either end that contain cylindrical open barred cages in which mice or objects are  
172 placed. An inanimate object is placed in one of the barred cages in one side chamber, and an  
173 unfamiliar mouse is placed in the barred cage in the other side chamber. A test subject mouse is  
174 placed in the central chamber and allowed to freely interact with the mice or objects in the side  
175 chambers. The social interaction test we employed had three phases. First, the test subject (prenatal  
176 *Lm*-exposed male = 10 and female = 8; control male = 5 and female = 5; 8 – 12 weeks of age) was  
177 habituated in the center of chamber for 10 minutes and two doorways in the chambers were closed.  
178 Second, the test subject was habituated to all three chambers for 10 minutes. Third, the subject was

179 confined to the middle chamber, a novel object (lab tape) was placed in the barred cage in one side  
180 chamber, and a novel mouse (a treatment, sex, and age matched unfamiliar mouse) was placed in  
181 the other side chamber.

182 The social interaction in each test was recorded for 10 minutes. Sniffing time for each  
183 subject was recorded. Self-grooming, which is defined as time spent rubbing the face, scratching  
184 with a foot, or licking paws, was examined to measure repetitive and persistent behavior<sup>28</sup>. During  
185 the three-chamber social approach assay, self-grooming was measured by using a stopwatch.

### 186 **Open field exploration**

187 Open field exploration tests measure anxiety, exploration and locomotion<sup>29</sup>. Mice (prenatal  
188 *Lm*-exposed male = 8 and female = 10; control male = 4 and female = 3, 8 – 12 weeks of age) were  
189 acclimated for 30 minutes before the assay. Mice were placed in the middle of the testing area (63  
190 cm x 60 cm x 31 cm) and underwent a 10-minute exploration period. Sessions were video recorded  
191 and analyzed using the ANY-maze Video Tracking System software.

192

## 193 RESULTS

### 194 BLI and postnatal effects of placental infection

195 All infections were performed by intravenous (IV) injection into pregnant CD1 mice with  
196  $5 \times 10^5$  colony forming units (CFU) of the bioluminescent *Lm* strain 2C (Perkin Elmer Xen36) on  
197 E14.5. The dose and timing were selected based on our prior studies<sup>21</sup>. The IV route of *Lm*-  
198 infection in pregnant mice is employed rather than oral infection for several reasons; the foremost  
199 being that oral infection requires over  $10^{11}$  CFU in CD1 mice and is not reproducible between  
200 laboratories. In contrast, IV infection is highly reproducible and bypasses the intestine, seeding the  
201 placenta directly in a dose-dependent manner. The selected dose results in stillbirth, abortion, and  
202 developmental abnormality, resembling listeriosis in pregnant women. An IVIS image of *Lm*-  
203 infected pregnant CD1 mouse is shown in Figure 1a, with BLI signals indicating different infection  
204 sites, including gallbladder, placentas, and fetuses. BLI of excised uterine horns shows that there  
205 is a range of infection severity indicated by the intensity of the BLI signals from the placentas (Fig.  
206 1b). In addition, BLI demonstrated that *Lm*-infection was much greater in the placenta than the  
207 fetus (Fig. 1c), as most often at this dose the signal was only detectable in the placenta. This result  
208 was consistent with other studies that showed that fetal infection only occurs at high doses<sup>12,30</sup>.

209 When the *Lm*-infected pregnant CD1 mice gave birth, the pups showed a range of postnatal  
210 effects of placental infection. Some pups showed extreme low birth weight and altered body  
211 morphology (4 weeks old; Fig. 1d). These effects were correlated with signal levels in the live  
212 pregnant dam. Higher signal levels of  $>10^5$  photons/sec produced more severe effects such as  
213 stillbirth and extremely low birth weight, whereas signals  $<4 \times 10^4$  photons/sec yielded litters of  
214 normal-sized pups. In addition, pups from infected pregnant dams that showed  $<4 \times 10^4$  photons/sec  
215 and were indistinguishable from controls exhibited delayed eye opening (postnatal day 13; Fig.

216 1e). These findings show that placental infection with *Lm* affects fetal and postnatal development.  
217 The range of effects was correlated with overall signal intensities from the live pregnant animal.  
218 At the dose we employed, none of the pregnant dams exhibited overt symptoms and they were  
219 outwardly indistinguishable from PBS-injected controls. Although some pregnant dams showed  
220 BLI signals from the area of the liver and/or gallbladder, all of them survived to give birth if they  
221 were allowed to do so.

### 222 **Effect of placental infection on fetal cortical development**

223 To determine whether placental infection promotes morphological changes in the fetal  
224 cortex, we performed hematoxylin/eosin (H&E) staining of the cortical sections of fetal brains.  
225 Pregnant CD1 mice were infected as described above and imaged to ascertain infection levels. We  
226 compared fetuses from infected and PBS-injected controls, but also fetuses within on pregnant  
227 dam that exhibited high and low signals from the placenta. The latter observation allowed us to  
228 distinguish effects due to systemic MIA from localized effects of the placenta. In the sections,  
229 layering was abnormal in the fetal brains from mice that originated from infected dams compared  
230 to controls (Fig 2a), and fetal brains from mice where the placentas exhibiting BLI signals above  
231 background showed layering alterations compared to fetuses from the same dam where the  
232 placenta had background BLI signals from the same dam (Fig. 2b).

### 233 **Infection of the placenta alters gene expression in the fetal mouse brain**

234 We next investigated the effect of placental infection on transcriptomic alterations in fetal  
235 brain. For these investigations, we used fetal brains from mice in which no BLI signal over  
236 background was detectable in the placenta. A total of 25 whole fetal brains (6 control and 19 *Lm*-  
237 exposed samples) were harvested on E18.5 to generate RNA-seq datasets and performed  
238 differential expression analysis using a DESeq2 package in R. The analysis revealed that IV

239 injection of bioluminescent *Lm* into pregnant CD1 mice at E14.5 altered gene expression in the  
240 fetal mouse brain. Overall, *Lm*-exposed fetal brains had a total of 268 upregulated and 139  
241 downregulated differentially expressed genes (DEGs) with a false discover rate (FDR) <0.05  
242 threshold, and 1697 upregulated and 1247 downregulated with a  $p < 0.05$  threshold (Fig. 3a).  
243 Among DEGs, most significant genes include upregulated *Lym7*, *Flt1*, *Vegfa* and *Kdm3a*, and  
244 downregulated *Zfp125*, *Mfsd5*, *slc38a5*, *Mblac1*, and *Chd15* (Fig 3b). The Gene Ontology (GO)  
245 enrichment and KEGG analysis of upregulated DEGs revealed pathways, such as macromolecule  
246 biosynthetic and nitrogen compound metabolic processes, and hypoxia inducible factor-1 (HIF-1)  
247 signaling pathway (Fig. 3c). Furthermore, pathways such as establishment of localization in cell  
248 and protein processing in endoplasmic reticulum were identified among significantly  
249 downregulated DEGs (Fig. 3c). Many of these genes are associated with brain development or  
250 neurological function<sup>31–34</sup>. Together, differential expression analysis demonstrated that placental  
251 infection by *Lm* causes disruption of neurodevelopment during pregnancy.

## 252 **Male and female fetal brains exhibit distinct gene expression profiles in response to placental** 253 **infection**

254 To examine sex-specific gene expression patterns, we used *Xist*, a female specific gene, to  
255 identify sex of each fetal brain RNA-seq sample (males: 9 *Lm*-exposed and 3 controls; females:  
256 10 *Lm*-exposed and 3 controls). We used DESeq2 in R to identify DEGs and investigated  
257 overlapping genes between both *Lm*-exposed sexes. A total of 44 and 42 downregulated DEGs  
258 were identified for males and females, respectively, with one gene overlapping between the sexes  
259 (Fig. 4a). Interestingly, females had 171 upregulated DEGs while males had 50 upregulated DEGs  
260 with 7 DEGs overlapping between the sexes (Fig. 4b). GO enrichment and KEGG analysis of  
261 upregulated DEGs of *Lm*-exposed male fetal brains identified pathways, such as VEGF receptor 2



262 binding, HIF-1 signaling, and microtubule organizing center (Fig. 4c). In addition, ribosome,  
263 mitochondrial translation elongation and termination, and oligosaccharyltransferase complex  
264 pathways were identified in downregulated DEGs of *Lm*-exposed male fetal brains (Fig. 4d).  
265 Analysis of the GO enrichment and KEGG analyses of upregulated DEGs in *Lm*-exposed female  
266 fetal brains demonstrated organelle related and nuclear speck pathways, whereas catenin complex  
267 and postsynaptic actin cytoskeleton pathways were identified in downregulated DEGs. (Fig. 4c  
268 and d) These findings demonstrated that placental infection had different effects on male versus  
269 female brains during neurodevelopment.

### 270 **Placental infection induces sex-specific behavioral alterations in adult offspring**

271 We sought to determine if altered behaviors were induced in the progeny of dams infected  
272 with *Lm*. Bacterial chorioamnionitis, which is not placental, leads to autism-like alterations in the  
273 behavioral of progeny in animals<sup>35</sup>, so we selected behavioral tests that are used as correlates for  
274 human ASD. For this purpose, we screened the pregnant dams with BLI to identify those with  
275 signals less than  $4 \times 10^4$  photons/sec. These mice give birth to normal-sized pups, which cannot be  
276 grossly distinguished from controls from PBS-injected dams. When the pups were 8 to 12 weeks  
277 of age, we performed behavioral assays to determine if the adult mouse offspring exhibit abnormal  
278 behavioral due to placental infection by *Lm*. We separated mice tested with behavior assays by sex  
279 to determine if placental infection results in a sex bias of these effects. First, we analyzed social  
280 interaction by using the three-chamber social approach assay to assess social impairment. Social  
281 interactions are important for forming bonds for rodents, and autism-relevant behavior mouse  
282 models have demonstrated reduction in reciprocal social interactions. *Lm*-exposed male adult  
283 offspring presented with significant reduction in social interaction time with an unfamiliar mouse,

284 whereas *Lm*-exposed female adult offspring did not exhibit impairment in socialization (Fig. 5a;  
285 two-way ANOVA,  $p = 0.016$  by Tukey's HSD test).

286 To assess repetitive behavior with restricted interests, the duration of self-grooming  
287 behavior was examined during the three-chamber social approach assay. *Lm*-exposed male adult  
288 offspring spent significantly more time self-grooming compared to the PBS treated male mice (Fig  
289 5b; two-way ANOVA,  $p = 0.044$  by Tukey's HSD test). However, self-grooming behavior of  
290 female adult offspring was not affected by placental infection.

291 Next, we examined the level of anxiety and locomotion using an open field exploration test.  
292 Rodents are hesitant to enter an unfamiliar brightly lit open field, but they gradually explore the  
293 area. Higher level of thigmotaxis, a subject remaining close to walls, is usually indicative of  
294 heightened anxiety<sup>36</sup>. Compared with PBS treated controls, *Lm*-exposed female adult offspring  
295 spent less time in the center of the field (two-way ANOVA,  $p = 0.011$  by *post hoc* test). However,  
296 *Lm*-exposed male adult offspring did not show difference in total time spent in the center compared  
297 to the PBS treated male group (Fig. 5c). In addition, both *Lm*-exposed male and female groups  
298 showed no difference in total travel distance, which indicates locomotion activity was not affected  
299 (Fig. 5e). Together, placental infection causes abnormal behaviors in offspring that are relevant to  
300 human neuropsychiatric disorder symptoms, including elevated anxiety, increased repetitive  
301 behavior, and impaired social interaction.

### 302 **Differential expression of the activation marker c-Fos**

303 To begin to identify changes in the adult brain due to placental infection, we  
304 immunohistochemically labeled brain sections of mice from different test groups with anti-c-Fos  
305 (Fig. 5), which has been used to characterize neuronal activity differences in MIA models<sup>37,38</sup>. In  
306 these preliminary experiments, we labeled coronal sections of four male and female *Lm*-exposed

307 mice brains and two controls mice with anti-c-Fos, a marker of brain cell activation. The results  
308 are shown in Figure 6. Sections from male mice exposed to prenatal *Lm* infection had increased c-  
309 Fos labeling compared to exposed brains from female mice and control mic. While these results  
310 are based limited in numbers of tested animals, they suggest increased neuronal activation in male  
311 mice exposed to *Lm* as a possible corollary of the sex-specific alterations of behavior  
312

## 313 **DISCUSSION**

314 Prenatal infection is highly diverse and leads to a wide variety of outcomes both for the  
315 pregnant mother and the developing fetus. Animal models continue to reveal important  
316 mechanisms of fetal abnormality due to infection, including effects on fetal brain development that  
317 lead to abnormal behavior. Although injecting pregnant mice with immunogens, such as LPS or  
318 poly(I:C), consistently results in altered behavior and brain abnormalities in the progeny, the  
319 results of these studies are quite heterogenous<sup>39</sup>. In addition, these chemicals cannot be used to  
320 determine the effects of localized bacterial infections. The placental infection model using *Lm*  
321 reflects a typical subclinical infection in humans and our methods of infection allows for the  
322 analysis of abnormalities that are not due to symptomatic disease of the pregnant subject. In  
323 addition, *Lm* is well characterized and has been used for decades in placental infection models.  
324 Although listeriosis may cause serious and even fatal consequences for pregnant women and their  
325 offspring, its effect on neurodevelopment of the adult offspring has not been characterized. Here,  
326 we used bioluminescent *Lm* and the IVIS imaging system to determine if placental infection affects  
327 fetal neurodevelopment and the behavior of offspring in mice.

328 The identification of biological pathways in exposed whole brain transcriptome data  
329 suggests that placental infection with *Lm* dysregulates transcriptional levels of several different  
330 processes during neurodevelopment. First, the HIF-1 signaling pathway was upregulated,  
331 suggesting placental infection induces hypoxic conditions in the fetal brain during  
332 neurodevelopment. Numerous studies indicate that prenatal hypoxia results in various postnatal  
333 deficits, including reduced body and brain weight, delayed development, and impaired synaptic  
334 plasticity. Notably, *Vegfa* (vascular endothelial growth factor A), which promotes cortical  
335 interneuron proliferation, migration, and vasculature in the forebrain<sup>40,41</sup>, and *Flt1* (Fms related

336 receptor tyrosine kinase), which plays an important role in regulation of angiogenesis and  
337 development of embryonic vasculature<sup>42,43</sup>, are among the main genes that are upregulated in the  
338 HIF-1 signaling pathway. Dysregulation of these genes has been identified in neuropsychiatric  
339 disorders<sup>33,44</sup>. In addition, recent MIA studies demonstrated induction of hypoxia in the brain<sup>4,6</sup>.  
340 Identifying elements of conservation between MIA and bacterial infection models should be  
341 examined. Interestingly, previous rodent studies have shown that prenatal hypoxia is associated  
342 with alterations in biochemical pathways during brain development, including nucleic acids  
343 process and metabolic process pathways<sup>45,46</sup>. Among these pathways, *Kdm3A* (lysine demethylase  
344 3A), which plays an important role in regulating mitochondrial biogenesis by sensing oxygen  
345 availability<sup>47</sup>, and *Vegfa* genes were upregulated. Lastly, protein processing in the endoplasmic  
346 reticulum (ER) pathway was downregulated due to placental infection by *Lm*. Dysregulation of  
347 protein synthesis has previously been suggested as one of the cellular responses to a hypoxic  
348 condition<sup>48</sup> and implicated in various neuropsychiatric disorders<sup>49</sup>. Furthermore, a recent study  
349 found that poly(I:C) induced MIA triggers ER stress as a cellular response to inflammation and  
350 results in reduced protein synthesis<sup>38</sup>. Future work should examine the effect of placental infection  
351 on different types of cells in the fetal brain during neurodevelopment using single-cell RNA-seq.

352 Sexual dimorphism in neuropsychiatric disorders is well recognized. However, the basis  
353 of this dichotomy is unknown. One hypothesis proposes sex-specific vulnerability and response to  
354 environmental insults during pregnancy as one cause of sex dimorphism in these disorders. Recent  
355 MIA studies demonstrate that inflammation during pregnancy caused sex-biased placental and  
356 fetal pro-inflammatory responses<sup>6</sup>. Although we did not observe significant differences in BLI  
357 signals of *Lm* from placentas between male and female mice, sexually dichotomous responses are  
358 consistent with our transcriptional analysis. Interestingly, we observed more upregulated number

359 of DEGs in brain from *Lm*-exposed female mice compared to brains of *Lm*-exposed male mice  
360 (Fig. 4b), but we did not find many biologically meaningful pathways in females. Consistent with  
361 previous MIA study, upregulation of HIF-1 signaling pathway was only enriched in *Lm*-exposed  
362 males, suggesting males are more susceptible to hypoxia during pregnancy. Future work should  
363 examine at the protein level by performing proteomic analysis to better understand how the male  
364 and female brain development is impacted by *Lm* infection during pregnancy.

365 Our behavioral results highlight possible pathogen specificity among rodent MIA-  
366 associated models. Injection of immune stimulants such as LPS or poly(I:C), into pregnant animals  
367 results in behavioral abnormalities in offspring that are notably relevant to ASD. Similar to these  
368 MIA-associated studies, *Lm*-exposed male offspring, but not female offspring, showed a  
369 significant reduction in social interaction and more frequent repetitive behaviors (Fig. 5a and b).  
370 These behavioral changes, and male-biased sex ratio, are observed in human ASD patients.  
371 Interestingly, we only observed significantly increased anxiety levels in *Lm*-exposed female  
372 offspring (Figure 5d), whereas MIA-associated male offspring exhibited heightened anxiety levels  
373 during open field exploration. It is important to note that numerous MIA studies have investigated  
374 behavioral changes only using male offspring<sup>50-52</sup> because the prevalence of developing ASD is  
375 higher in males than in females. This difference remains to be further investigated; however,  
376 women are more likely to be diagnosed with human anxiety disorders. Another behavioral  
377 discrepancy was observed in locomotor activity. In our studies, placental infection did not alter  
378 locomotor activity in both sexes. Interestingly, Allard et al. demonstrated that prenatal infection  
379 with live Group B *Streptococcus*, a major health concern during pregnancy implicated in preterm  
380 birth and stillbirth, led to hyper-locomotor and elevated anxiety behaviors in male rat offspring,  
381 but not in female rat offspring<sup>35</sup>. Our contrasting results highlight the need to examine diverse

382 prenatal pathogens, as it is becoming clear that different infections result in distinct neurological  
383 abnormalities. Studies have shown that if the locomotor activity is altered due to a treatment effect,  
384 it has a confounding effect on the movement of the animal subject during open field exploration<sup>29</sup>.  
385 In preliminary results, we have shown increased c-Fos labeling in brain of male but not female  
386 mice when they were exposed to *Lm* in utero (Fig. 6). This result suggests that hyperactivity of  
387 cortical neurons may be one underlying mechanism of the sexual dimorphism. Large scale and  
388 more in-depth studies will be needed to confirm this hypothesis.

389         One of the limitations of our studies is that individual placental BLI signals cannot be  
390 correlated with the behavior of individual offspring. Although the BLI signal of the pregnant dam  
391 can be measured using an IVIS, severity of each placental infection cannot be quantified except  
392 by sacrificing the animal. In our model, individual placentas are differentially infected by *Lm* (Fig.  
393 1b), and our previous findings show that fetal pathologies, such as bradycardia and fetal resorption,  
394 are correlated with BLI signals from pregnant dams. Since high BLI signals in pregnant mice may  
395 result in severe postnatal consequences for the offspring, we used the animals that showed  
396 relatively low BLI signals for the behavioral analysis. We wished to compare healthy, normal-  
397 sized offspring and did not perform behavioral studies of stunted animals such as shown in Figure  
398 1d. Another limitation of this study is the limited dose and timing of *Lm* infection we selected.  
399 According to epidemiological studies, developing psychiatric disorders is highly associated with  
400 severity and timing of the infection<sup>53</sup>. Furthermore, MIA-associated brain transcriptomic data from  
401 LPS and poly(I:C) have demonstrated different profiles of DEGs were observed in fetal brains that  
402 were collected at various time points<sup>4</sup>. Different doses and timing of *Lm* infection are likely to  
403 yield different outcomes in our behavioral and transcriptomic outcomes studies and should be  
404 performed. We have not studied the consequences of direct infection of the fetal brain, which

405 occurs in mice with higher BLI signals, nor the effect of infection of maternal organs such as the  
406 liver or spleen, which would induce MIA. Finally, we are very interested in ascertaining the role  
407 of maternal antigen-specific immunity. These studies could be performed by vaccinating the dams  
408 before pregnancy.

409 In summary, we have established that placental infection by *Listeria* affects the trajectory  
410 of fetal neurodevelopment during pregnancy. We showed sex-specific dysregulation of the fetal  
411 brain transcriptome due to *Lm* infection during pregnancy. We also demonstrated that prenatal  
412 infection causes sex-specific behavioral abnormalities in offspring that resemble human ASD and  
413 anxiety-related disorders, which are known to have sexually dimorphic effects. Altogether, we  
414 have identified neurodevelopmental effects of placental infection by bacteria and expanded models  
415 of prenatal infection-associated sexual dimorphism of behavior, thus improving our understanding  
416 of the development of neuropsychiatric disorders.

417



418 **Data availability Statement**

419 The datasets, including RNA-seq fastq and raw counts of sequencing reads, can be accessed  
420 through the NCBI Gene Expression Omnibus.

421 **References**

- 422 1. Atladóttir, H. Ó. *et al.* Maternal infection requiring hospitalization during pregnancy and  
423 autism spectrum disorders. *J. Autism Dev. Disord.* **40**, 1423–1430 (2010).
- 424 2. Brown, A. S. *et al.* Serologic evidence of prenatal influenza in the etiology of  
425 schizophrenia. *Arch. Gen. Psychiatry* **61**, 774–780 (2004).
- 426 3. Sørensen, H. J., Mortensen, E. L., Reinisch, J. M. & Mednick, S. A. Association between  
427 prenatal exposure to bacterial infection and risk of Schizophrenia. *Schizophr. Bull.* **35**,  
428 631–637 (2009).
- 429 4. Canales, C. P. *et al.* Sequential perturbations to mouse corticogenesis following in utero  
430 maternal immune activation. *Elife* **10**, 1–27 (2021).
- 431 5. Choi, G. B. *et al.* The maternal interleukin-17a pathway in mice promotes autism-like  
432 phenotypes in offspring. *Science (80-. )*. **351**, 933–939 (2016).
- 433 6. Braun, A. E. *et al.* “Females are not just ‘Protected’ Males”: Sex-specific vulnerabilities in  
434 placenta and brain after prenatal immune disruption. *eNeuro* **6**, (2019).
- 435 7. Makinson, R. *et al.* Intrauterine inflammation induces sex-specific effects on  
436 neuroinflammation, white matter, and behavior. *Brain. Behav. Immun.* **66**, 277–288  
437 (2017).
- 438 8. Bergeron, J. D. L. *et al.* White matter injury and autistic-like behavior predominantly  
439 affecting male rat offspring exposed to group B streptococcal maternal inflammation. *Dev.*  
440 *Neurosci.* **35**, 504–515 (2013).

- 441 9. Mortensen, P. B. *et al.* Toxoplasma gondii as a Risk Factor for Early-Onset  
442 Schizophrenia: Analysis of Filter Paper Blood Samples Obtained at Birth. *Biol. Psychiatry*  
443 **61**, 688–693 (2007).
- 444 10. Brown, A. S., Schaefer, C. A., Quesenberry, C. P., Shen, L. & Susser, E. S. No evidence  
445 of relation between maternal exposure to herpes simplex virus type 2 and risk of  
446 schizophrenia? *Am. J. Psychiatry* **163**, 2178–2180 (2006).
- 447 11. Khandaker, G. M., Zimbron, J., Lewis, G. & Jones, P. B. Prenatal maternal infection,  
448 neurodevelopment and adult schizophrenia: A systematic review of population-based  
449 studies. *Psychol. Med.* **43**, 239–257 (2013).
- 450 12. Bakardjiev, A. I., Theriot, J. A. & Portnoy, D. A. Listeria monocytogenes traffics from  
451 maternal organs to the placenta and back. *PLoS Pathog.* **2**, 0623–0631 (2006).
- 452 13. Hamrick, T. S. *et al.* Influence of pregnancy on the pathogenesis of listeriosis in mice  
453 inoculated intragastrically. *Infect. Immun.* **71**, 5202–5209 (2003).
- 454 14. People at Risk - Pregnant Women and Newborns | Listeria | CDC. Available at:  
455 <https://www.cdc.gov/listeria/risk-groups/pregnant-women.html>. (Accessed: 5th March  
456 2022)
- 457 15. Lecuit, M. Understanding how Listeria monocytogenes targets and crosses host barriers.  
458 *Clin. Microbiol. Infect.* **11**, 430–436 (2005).
- 459 16. Robbins, J. R., Skrzypczynska, K. M., Zeldovich, V. B., Kapidzic, M. & Bakardjiev, A. I.  
460 Placental syncytiotrophoblast constitutes a major barrier to vertical transmission of  
461 Listeria monocytogenes. *PLoS Pathog.* **6**, (2010).
- 462 17. Johnson, L. J. *et al.* Human Placental Trophoblasts Infected by Listeria monocytogenes  
463 Undergo a Pro-Inflammatory Switch Associated With Poor Pregnancy Outcomes. *Front.*

- 464 *Immunol.* **12**, 1–21 (2021).
- 465 18. Goldenberg, R. L., Culhane, J. F. & Johnson, D. C. Maternal infection and adverse fetal  
466 and neonatal outcomes. *Clin. Perinatol.* **32**, 523–559 (2005).
- 467 19. Lamont, R. F. *et al.* Listeriosis in Human Pregnancy. *Nih* **39(3)**, 227–236 (2011).
- 468 20. Charlier, C., Disson, O. & Lecuit, M. Maternal-neonatal listeriosis. *Virulence* **11**, 391–397  
469 (2020).
- 470 21. Hardy, J. *et al.* Infection of pregnant mice with listeria monocytogenes induces fetal  
471 bradycardia. *Pediatr. Res.* **71**, 539–545 (2012).
- 472 22. Hardy, J. *et al.* Extracellular Replication of Listeria monocytogenes in the Murine Gall  
473 Bladder. *Science (80-. )*. **303**, 851–853 (2004).
- 474 23. Dobin, A. *et al.* STAR: Ultrafast universal RNA-seq aligner. *Bioinformatics* **29**, 15–21  
475 (2013).
- 476 24. Liao, Y., Smyth, G. K. & Shi, W. FeatureCounts: An efficient general purpose program  
477 for assigning sequence reads to genomic features. *Bioinformatics* **30**, 923–930 (2014).
- 478 25. Love, M. I., Huber, W. & Anders, S. Moderated estimation of fold change and dispersion  
479 for RNA-seq data with DESeq2. *Genome Biol.* **15**, 1–21 (2014).
- 480 26. Raudvere, U. *et al.* G:Profiler: A web server for functional enrichment analysis and  
481 conversions of gene lists (2019 update). *Nucleic Acids Res.* **47**, W191–W198 (2019).
- 482 27. kevinblighe/EnhancedVolcano: Publication-ready volcano plots with enhanced colouring  
483 and labeling. Available at: <https://github.com/kevinblighe/EnhancedVolcano>. (Accessed:  
484 7th March 2022)
- 485 28. Yang, M., Silverman, J. L. & Crawley, J. N. Automated three-chambered social approach  
486 task for mice. *Curr. Protoc. Neurosci.* 1–16 (2011). doi:10.1002/0471142301.ns0826s56

- 487 29. Seibenhener, M. L. & Wooten, M. C. Use of the open field maze to measure locomotor  
488 and anxiety-like behavior in mice. *J. Vis. Exp.* 1–6 (2015). doi:10.3791/52434
- 489 30. Le Monnier, A., Join-Lambert, O. F., Jaubert, F., Berche, P. & Kayal, S. Invasion of the  
490 placenta during murine listeriosis. *Infect. Immun.* **74**, 663–672 (2006).
- 491 31. Bhalla, K. *et al.* Alterations in CDH15 and KIRREL3 in Patients with Mild to Severe  
492 Intellectual Disability. *Am. J. Hum. Genet.* **83**, 703–713 (2008).
- 493 32. Kim, J. H., Lee, J. H., Lee, I. S., Lee, S. B. & Cho, K. S. Histone lysine methylation and  
494 neurodevelopmental disorders. *Int. J. Mol. Sci.* **18**, 1–20 (2017).
- 495 33. Lange, C., Storkebaum, E., De Almodóvar, C. R., Dewerchin, M. & Carmeliet, P.  
496 Vascular endothelial growth factor: A neurovascular target in neurological diseases. *Nat.*  
497 *Rev. Neurol.* **12**, 439–454 (2016).
- 498 34. Fernandes, A. *et al.* Hypoxia-Inducible Factor (HIF) in Ischemic Stroke and  
499 Neurodegenerative Disease. (2021). doi:10.3389/fcell.2021.703084
- 500 35. Allard, M. J. *et al.* A sexually dichotomous, autistic-like phenotype is induced by Group B  
501 Streptococcus maternofetal immune activation. *Autism Res.* **10**, 233–245 (2017).
- 502 36. Simon, P., Dupuis, R. & Costentin, J. Thigmotaxis as an index of anxiety in mice.  
503 Influence of dopaminergic transmissions. *Behav. Brain Res.* **61**, 59–64 (1994).
- 504 37. Shin Yim, Y. *et al.* Reversing behavioural abnormalities in mice exposed to maternal  
505 inflammation. *Nature* **549**, 482–487 (2017).
- 506 38. Kalish, B. T. *et al.* Maternal immune activation in mice disrupts proteostasis in the fetal  
507 brain. *Nat. Neurosci.* **24**, 204–213 (2021).
- 508 39. Kentner, A. C. *et al.* Maternal immune activation: reporting guidelines to improve the  
509 rigor, reproducibility, and transparency of the model. *Neuropsychopharmacology* **44**, 245–

- 510 258 (2019).
- 511 40. Barber, M. *et al.* Vascular-derived VEGFA promotes cortical interneuron migration and  
512 proximity to the vasculature in the developing forebrain. *Cereb. Cortex* **28**, 2577–2593  
513 (2018).
- 514 41. Ferrara, N. *et al.* inactivation of the VEGF gene. **380**, 439–442 (1996).
- 515 42. Ji, S., Xin, H., Li, Y. & Su, E. J. FMS-like tyrosine kinase 1 (FLT1) is a key regulator of  
516 fetoplacental endothelial cell migration and angiogenesis. *Placenta* **70**, 7–14 (2018).
- 517 43. Fong, G. H., Rossant, J., Gertsenstein, M. & Breitman, M. L. Role of the Flt-1 receptor  
518 tyrosine kinase in regulating the assembly of vascular endothelium. *Nature* **376**, 66–70  
519 (1995).
- 520 44. Carmeliet, P. & Storkebaum, E. Vascular and neuronal effects of VEGF in the nervous  
521 system: Implications for neurological disorders. *Semin. Cell Dev. Biol.* **13**, 39–53 (2002).
- 522 45. Peyronnet, J. *et al.* Prenatal hypoxia, impairs the postnatal development of neural and  
523 functional chemoafferent pathway in rat. *J. Physiol.* **524**, 525–537 (2000).
- 524 46. Gross, J., Burgoyne, R. D. & Rose, S. P. R. Influence of Prenatal Hypoxia on Brain  
525 Development: Effects on Body Weight, Brain Weight, DNA, Protein,  
526 Acetylcholinesterase, 3-Quinuclidinyl Benzilate Binding, and In Vivo Incorporation of  
527 [<sup>14</sup>C]Lysine into Subcellular Fractions. *J. Neurochem.* **37**, 229–237 (1981).
- 528 47. Qian, X. *et al.* KDM3A Senses Oxygen Availability to Regulate PGC-1 $\alpha$ -Mediated  
529 Mitochondrial Biogenesis. *Mol. Cell* **76**, 885-895.e7 (2019).
- 530 48. Koumenis, C. *et al.* Regulation of Protein Synthesis by Hypoxia via Activation of the  
531 Endoplasmic Reticulum Kinase PERK and Phosphorylation of the Translation Initiation  
532 Factor eIF2 $\alpha$ . *Mol. Cell. Biol.* **22**, 7405–7416 (2002).

- 533 49. Laguesse, S. & Ron, D. Protein Translation and Psychiatric Disorders. *Neuroscientist* **26**,  
534 21–42 (2020).
- 535 50. Zuckerman, L. & Weiner, I. Maternal immune activation leads to behavioral and  
536 pharmacological changes in the adult offspring. *J. Psychiatr. Res.* **39**, 311–323 (2005).
- 537 51. Meyer, U. *et al.* Adult behavioral and pharmacological dysfunctions following disruption  
538 of the fetal brain balance between pro-inflammatory and IL-10-mediated anti-  
539 inflammatory signaling. *Mol. Psychiatry* **13**, 208–221 (2008).
- 540 52. Wolff, A. R., Cheyne, K. R. & Bilkey, D. K. Behavioural deficits associated with maternal  
541 immune activation in the rat model of schizophrenia. *Behav. Brain Res.* **225**, 382–387  
542 (2011).
- 543 53. Lee, B. K. *et al.* Maternal hospitalization with infection during pregnancy and risk of  
544 autism spectrum disorders. *Brain. Behav. Immun.* **44**, 100–105 (2015).
- 545
- 546

547 **Disclosures**

548 No human patients were involved in this study. All animal procedures were approved by  
549 Institutional Animal Care and Use Committee and the Biosafety Committee of Michigan State  
550 University under animal protocol number 201800030.

551 **Contributions**

552 K.H.L. designed the experiment, performed experiments, collected data, wrote the draft and  
553 edited the manuscript. M.K and T.W. design and executed experiments and helped write the  
554 manuscript. P.P. designed and executed experiments and contributed to writing the manuscript. J.  
555 H. conceptualized the project, supervised the team with feedback and evaluation of the project,  
556 edited the manuscript. All authors read and approved the final manuscript.

557 **Acknowledgements**

558 The authors would like to acknowledge Dr. Kevin Childs, the director of Genomics Core at MSU  
559 for consulting regarding the RNA-seq experiment. Additionally, we also acknowledge Dr. Alexa  
560 Veenema for the help with behavioral assays.

561 **Funding**

562 This work has partly supported by the March of Dimes Prematurity Research Center at Stanford  
563 University, and partly by Michigan State University Startup Funds for Jonathan Hardy.

564

565

566 **Figure legends**

567 **Fig. 1. Postnatal effects of placental infection. (a-c)** *In vivo* bioluminescence imaging (BLI) of  
568 prenatal *L. monocytogenes* (*Lm*) infection. **(a)** Live pregnant CD1 mouse on embryonic day 18.5  
569 (E.18.5). **(b)** Excised uterine horns and **(c)** placenta. **(d)** Low birth weight due to *Lm* placental  
570 infection in a 4-week-old mouse (left) compared to a littermate (right). **(e)** *Lm*-exposed offspring  
571 exhibiting delayed eye opening compared to controls **(f)** on postnatal day 13.

572 **Fig 2. Placental infection promotes abnormal cortical lamination. (a)** Coronal sections of fetal  
573 brain with normal layering in cortex from PBS-injected pregnant mice (left) and abnormal layering  
574 cortex from *Lm*-infected pregnant mice (right). **(b)** Abnormal layering in brains from mice with  
575 high placental BLI signal versus low placental BLI signal from the same pregnant animal. BLI  
576 signal is indicated in photons/s/cm<sup>2</sup>/str. Layers: I: molecular, II: external granular, III: external  
577 pyramidal, IV: internal granular, V: internal pyramidal, VI: multiform.

578 **Figure 3. Gene expression changes in the fetal brain due to placental infection with *Lm*. (a)**  
579 Total number of differentially expressed genes (DEGs) of fetal brains in response to placental  
580 infection. **(b)** Volcano plot of DEGs in *Lm*-exposed fetal brains of *Lm*-exposed mice at E18.5. Red  
581 dots indicate statistical significance ( $p$ -value  $< 10^6$ ) and  $\log_2$ (fold change) greater or less than 0.2.  
582 Total variables indicate the total number of genes that were used to generate a volcano plot. **(c)**  
583 Gene Ontology analysis of DEGs ( $p$ -adj  $< 0.05$ ) in fetal brains of *Lm*-exposed mice at E18.5.  
584 Biological pathways of downregulated and upregulated fetal brains of *Lm*-exposed mice were  
585 identified using g:ProfileR.

586 **Figure 4. Sexually dichotomous gene expression profiles induced by placental infection. (a,**  
587 **b)** Venn Diagrams representing the number of overlapping downregulated and upregulated genes  
588 in **(a)** and **(b)**, respectively. **(c, d)** Enrichment analysis of DEGs ( $p$ -adj  $< 0.05$  of fetal brains from



589 female and male *Lm*-exposed mice. Upregulated and downregulated biological pathways are  
590 shown in (c) and (d), respectively.

591 **Figure 5. Sex-specific abnormal behaviors in the offspring of *Lm*-infected pregnant mice. (a)**

592 *Lm*-exposed adult male mouse offspring display deficits in social interaction (sniffing of  
593 unfamiliar mice versus inanimate objects) whereas *Lm*-exposed adult female mouse offspring  
594 show no altered behavior. (b) *Lm*-exposed adult male mouse offspring exhibit high levels of

595 grooming (resembles repetitive behavior). Number (*n*) of offspring: control male (*n* = 5), *Lm*-  
596 exposed male (*n* = 10), control female (*n* = 5), and *Lm*-exposed female (*n* = 8) (a, b). (c)

597 Heightened level of anxiety observed only in *Lm*-exposed adult female mouse offspring. (d)

598 Differences in tracked movement during the open field exploration assay in *Lm*-exposed adult  
599 mouse offspring versus PBS controls. (e) No significant change in total distance traveled during

600 open field exploration. Control male (*n* = 3), *Lm*-exposed male (*n* = 8), control female (*n* = 3), and  
601 *Lm*-exposed female (*n* = 10) used in open field exploration. Data are shown as the mean ± SEM.

602 The behavioral assay data were analyzed by one-way analysis of variance (ANOVA) followed by  
603 Tukey's HSD test. \**P* < 0.05.

604 **Figure 6. Increased nuclear c-Fos labeling in adult mouse brain due to prenatal *Lm* infection.**

605 Brains of mice that were analyzed for behavior in Figure 5 (2 infected males, 2 infected females,  
606 2 uninfected females and one uninfected male) were immunohistochemically labeled for c-Fos.

607 Representative sections of (a) control male; (b) *Lm*-exposed male; (c) *Lm*-exposed female. DAB  
608 chromogen (brown), hematoxylin counterstain.

609

610 **Figure 1**

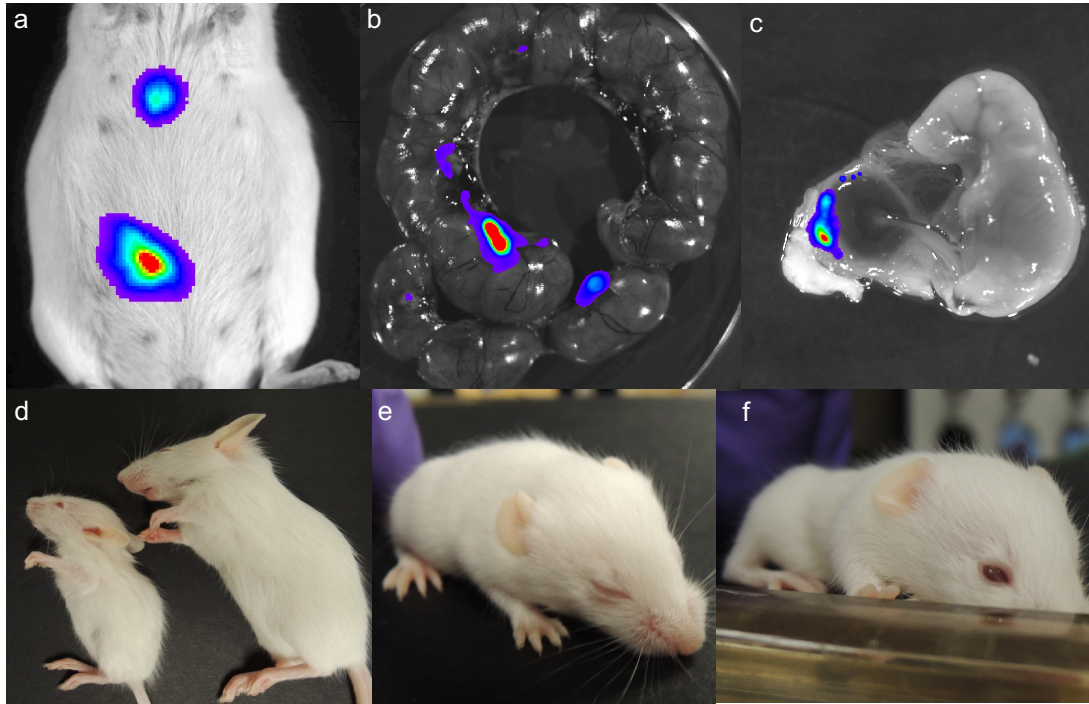

611

612

613

614

615 **Figure 2**

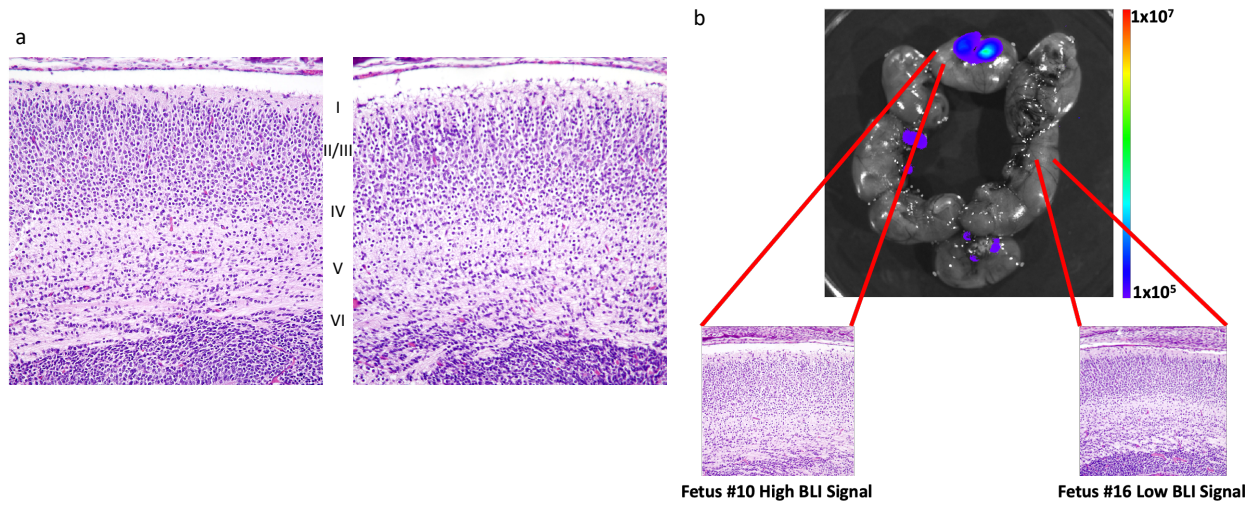

616

617

618 **Figure 3**

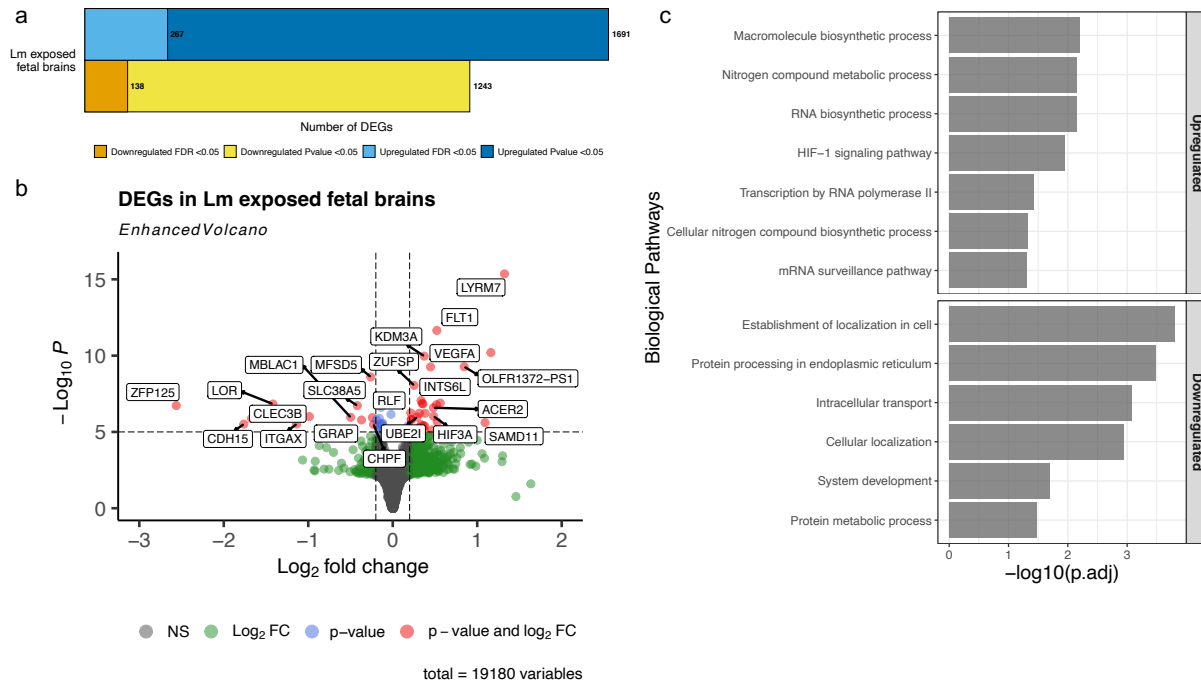

619  
620

621 **Figure 4**

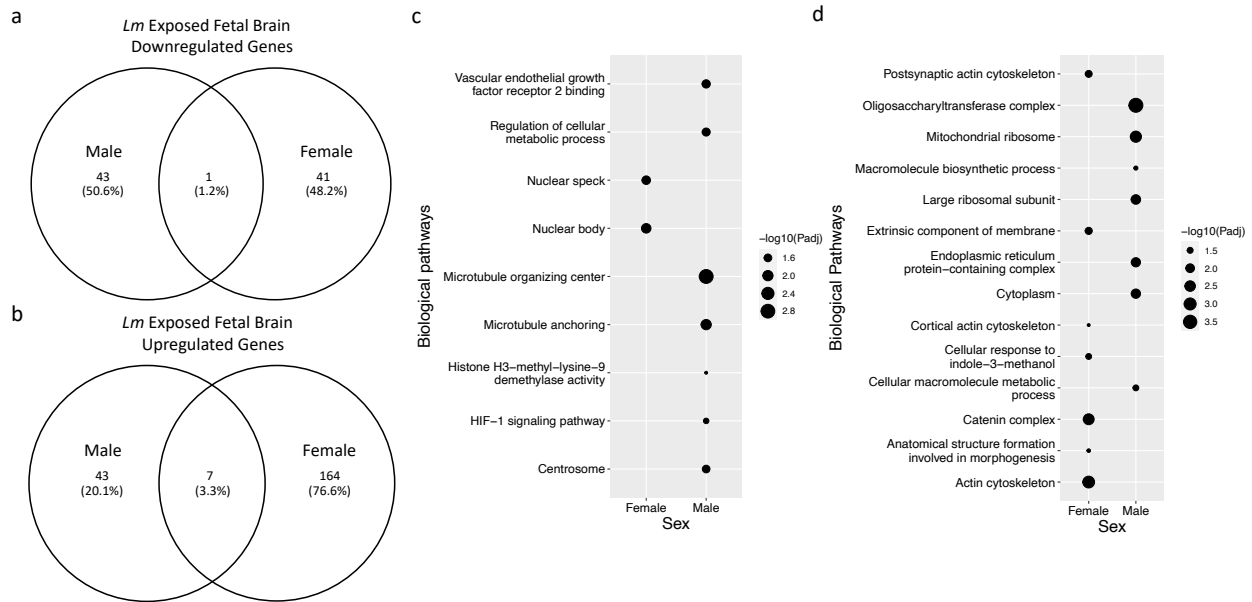

622  
623  
624

625 **Figure 5**

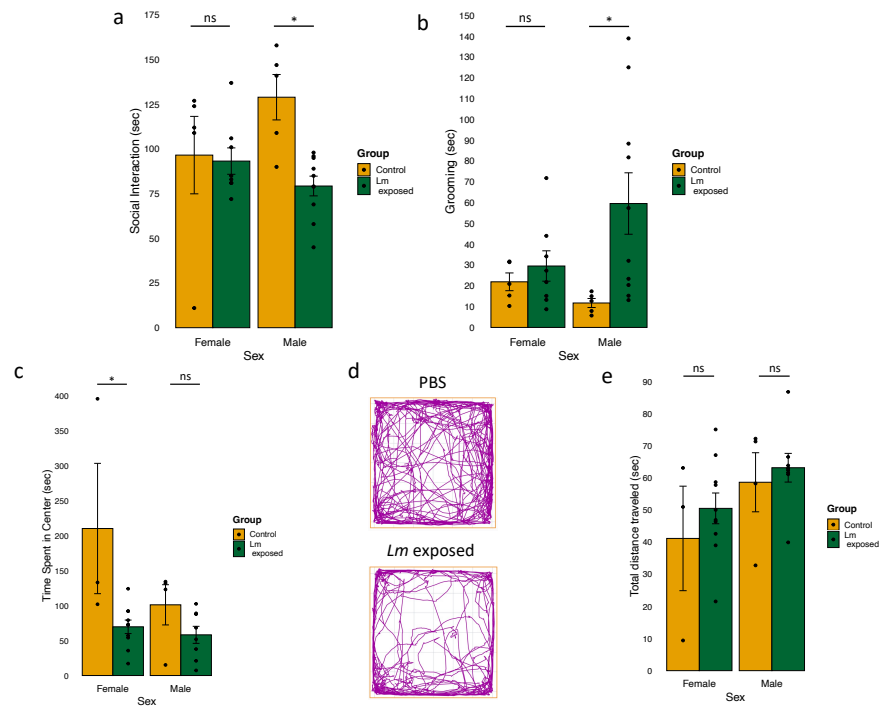

626  
627

628 **Figure 6**  
629

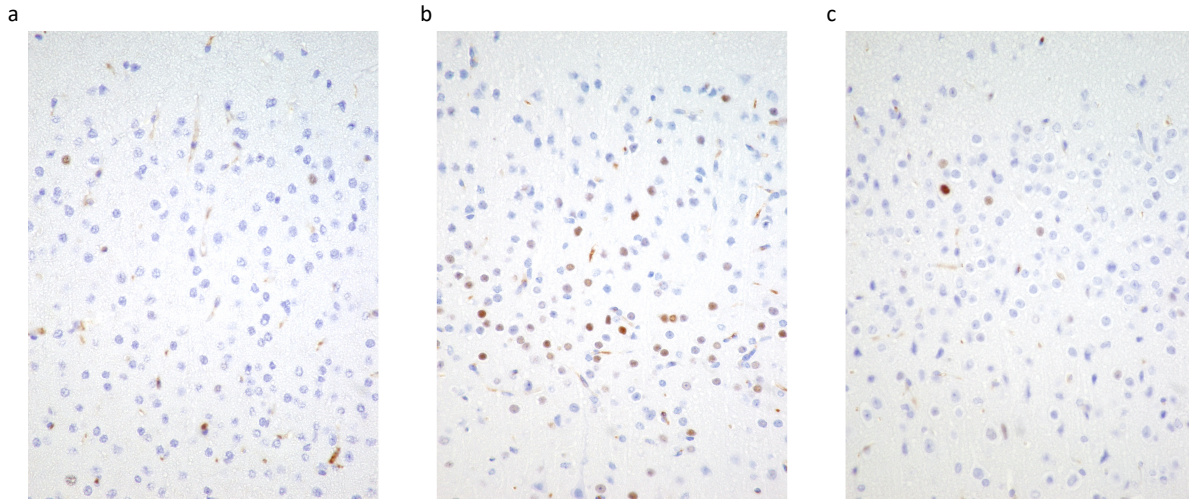

630  
631
